# Supplementary material for: Hormonal Therapy for Infantile Spasms: A Systematic Review and Meta-Analysis
Source: Front Neurol. 2022 Feb 10;13:772333. doi: 10.3389/fneur.2022.772333 (PMC8867209; doi:10.3389/fneur.2022.772333)
Supplement: Supplementary file 2 [file Table_2.XLSX]

## Sheet: Sheet1
Supplementary Table 1 The original data and assignment of treatment groups of all studies for network meta-analysis.
Study	Total events	Clinical-electro response	No response	Total events	Clinical-electro response	No response
	Low-dose ACTH			Low-dose corticosteroids
Hrachovy 1983	12	5	7	12	4	8
	Usual- or high-dose ACTH			Low-dose corticosteroids
Baram 1996	15	13	2	14	4	10
Sardar 2019	35	31	4	35	29	6
	Usual- or high-dose ACTH			High-dose corticosteroids
Lux 2004	25	18	7	30	20	10
Wanigasinghe 2015	49	9	40	48	21	27
Gowda 2019	18	7	11	15	4	11
	Usual- or high-dose ACTH			Low-dose ACTH
Hrachovy 1994	26	6	20	24	5	19
Shu 2009	15	8	7	15	9	6
Yanagaki 1999	13	6	7	12	6	6
	High-dose corticosteroids			Low-dose corticosteroids
Chellamuthu 2014	31	12	19	32	7	25
	High-dose corticosteroids			MEP
Kapoor 2021	29	20	9	31	17	14
	Low-dose ACTH			VGB
Vigevano 1997	19	11	8	23	4	19
Omar 2002	16	12	4	16	11	5
	Usual- or high-dose ACTH			VGB
Lux 2004	25	18	7	52	24	28
	Usual- or high-dose ACTH			KD
Dressler 2019	16	11	5	16	10	6
	Usual- or high-dose ACTH			Zonisamide
Angappan 2019	15	5	10	15	3	12
	Low-dose ACTH			ACTH+Mg
Zou 2010	19	5	14	19	9	10
	Usual- or high-dose ACTH			ACTH+VGB
O' Callaghan 2017	191	104	87	186	123	63
	High-dose corticosteroids			High-dose corticosteroids+pyridoxine
Kunnanayaka 2018	32	9	23	30	6	24
	High-dose corticosteroids			High-dose corticosteroids+TPM
Yi 2019	39	21	18	38	20	18
Supplementary Table 2 All direct and indirect comparisions of network meta-analysis.
Comparison ID	Comparison	Intervention 1	Intervention 2	RR	LCI 95%	HCI 95%
	Direct comparisons
1	Low-dose ACTH vs Low-dose corticosteroids	Low-dose ACTH	Low-dose corticosteroids	1.25	0.440376	3.54811
2	Usual- or high-dose ACTH vs Low-dose corticosteroids	Usual- or high-dose ACTH	Low-dose corticosteroids	1.12428	0.319102	3.96111
3	Usual- or high-dose ACTH vs High-dose corticosteroids	Usual- or high-dose ACTH	High-dose corticosteroids	0.920017	0.414303	2.04303
4	Usual- or high-dose ACTH vs Low-dose ACTH	Usual- or high-dose ACTH	Low-dose ACTH	0.936245	0.597169	1.46785
5	High-dose corticosteroids vs Low-dose corticosteroids	High-dose corticosteroids	Low-dose corticosteroids	1.76959	0.802691	3.90117
6	High-dose corticosteroids vs MEP	High-dose corticosteroids	MEP	1.25761	0.841257	1.88001
7	Low-dose ACTH vs VGB	Low-dose ACTH	VGB	1.31501	0.390497	4.42834
8	Usual- or high-dose ACTH vs VGB	Usual- or high-dose ACTH	VGB	1.56	1.06467	2.28579
9	Usual- or high-dose ACTH vs KD	Usual- or high-dose ACTH	KD	1.1	0.665067	1.81936
10	Usual- or high-dose ACTH vs Zonisamide	Usual- or high-dose ACTH	Zonisamide	1.66667	0.482505	5.757
11	Low-dose ACTH vs Low-dose ACTH+MgSO4	Low-dose ACTH	Low-dose ACTH+MgSO4	0.555556	0.228314	1.35183
12	Usual- or high-dose ACTH vs Usual- or high-dose ACTH+VGB	Usual- or high-dose ACTH	Usual- or high-dose ACTH+VGB	0.823394	0.697775	0.971629
13	High-dose corticosteroids vs High-dose Corticosteroids+pyridoxine	High-dose corticosteroids	High-dose corticosteroids+pyridoxine	1.40625	0.568902	3.47606
14	High-dose corticosteorids vs High-dose corticosteroids+TPM	High-dose corticosteroids	High-dose corticosteroids+TPM	1.02308	0.673004	1.55525
	Indirect comparisons of other treatments and usual- or high-dose ACTH (comparison IDs)
15	Indirect Low-dose ACTH vs Usual- or high-dose ACTH (1, 2)	Low-dose ACTH	Usual- or high-dose ACTH	1.11183	0.216671	5.70522
16	Indirect Low-dose ACTH vs Usual- or high-dose ACTH (7, 8)	Low-dose ACTH	Usual- or high-dose ACTH	0.842956	0.236052	3.01024
17	Indirect High-dose corticosteroids vs Usual- or high-dose ACTH (5, 2)	High-dose corticosteroids	Usual- or high-dose ACTH	1.57398	0.355819	6.96253
18	Indirect Low-dose corticosteroids vs Usual- or high-dose ACTH (5, 3)	Low-dose corticosteroids	Usual- or high-dose ACTH	0.614232	0.199786	1.88843
19	Indirect MEP vs Usual- or high-dose ACTH (6, 3)	MEP	Usual- or high-dose ACTH	0.86429	0.353726	2.11179
20	Indirect High-dose corticosteroids+pyridoxine vs Usual- or high-dose ACTH (13, 3)	High-dose corticosteroids+pyridoxine	Usual- or high-dose ACTH	0.772932	0.231312	2.58276
21	Indirect High-dose corticosteroids+TPM vs Usual- or high-dose ACTH (14, 3)	High-dose corticosteroids+TPM	Usual- or high-dose ACTH	1.06242	0.431495	2.61587
22	Indirect Low-dose corticosteroids vs Usual- or high-dose ACTH (1, 4)	Low-dose corticosteroids	Usual- or high-dose ACTH	0.854477	0.274358	2.66124
23	Indirect VGB vs Usual- or high-dose ACTH (7, 4)	VGB	Usual- or high-dose ACTH	0.812234	0.222519	2.96479
24	Indirect Low-dose ACTH+MgSO4 vs Usual- or high-dose ACTH (11, 4)	Low-dose ACTH+MgSO4	Usual- or high-dose ACTH	1.92257	0.709772	5.20772
	Combined results of direct and indirect comparisons (comparison IDs)
	Low-dose ACTH (4, 15, 16)	Low-dose ACTH	Usual- or high-dose ACTH	1.04477	0.693065	1.57494
	Low-dose corticosteroids (2, 18, 22)	Low-dose corticosteroids	Usual- or high-dose ACTH	0.767347	0.390897	1.50633
	High-dose corticosteroids (3, 17)	High-dose corticosteroids	Usual- or high-dose ACTH	1.18072	0.58457	2.38481
	MEP (19)	MEP	Usual- or high-dose ACTH	0.86429	0.353726	2.11179
	VGB (8, 23)	VGB	Usual- or high-dose ACTH	0.653294	0.452876	0.942405
	KD (9)	KD	Usual- or high-dose ACTH	0.909091	0.549643	1.50361
	Zonisamide (10)	Zonisamide	Usual- or high-dose ACTH	0.6	0.173702	2.07252
	Low-dose ACTH+MgSO4 (24)	Low-dose ACTH+MgSO4	Usual- or high-dose ACTH	1.92257	0.709772	5.20772
	Usual- or high-dose ACTH+VGB (12)	Usual- or high-dose ACTH+VGB	Usual- or high-dose ACTH	1.21449	1.0292	1.43313
	High-dose corticosteroids+pyridoxine (20)	High-dose corticosteroids+pyridoxine	Usual- or high-dose ACTH	0.772932	0.231312	2.58276
	High-dose corticosteroids+TPM (21)	High-dose corticosteroids+TPM	Usual- or high-dose ACTH	1.06242	0.431495	2.61587
	Consistency H	1
Note: MEP = methylprednisolone pulses; VGB = vagabatrin; KD = ketogenic diet; TPM = topiramate; LCI = lower confidence interval; HCI = higher confidence interval
